# Supplementary material for: Synergistic electronic modulation and Cl − shielding of Fe sites for robust seawater electrolysis
Source: Royal Society of Chemistry journal article supplement (doi:10.1039/d5qi02363g), 2026-01-01
Supplement: d5qi02363g1.pdf [file d5qi02363g1.pdf]

## Supporting Information

### **Synergistic electronic modulation and Cl<sup>-</sup> shielding of Fe sites for robust seawater electrolysis**

Hao Wang<sup>a+</sup>, Pengwu Jiang<sup>b+</sup>, Nannan Jiang<sup>a</sup>, Weili Zhang<sup>b</sup>, Bing Huang<sup>\*b</sup>, Xuwei Liu<sup>a</sup>, Huihui Jin<sup>a</sup>, and Lunhui Guan<sup>\*a</sup>

<sup>a</sup> State Key Laboratory of Structural Chemistry, Fujian Key Laboratory of Nanomaterials, Fujian Institute of Research on the Structure of Matter, Chinese Academy of Sciences, Fuzhou, Fujian 350002, China.

<sup>b</sup> Division of Biobased Chemicals, Institute of Zhejiang University-Quzhou, Quzhou 324000, P.R. China.

<sup>+</sup> These authors contributed equally: Hao Wang, Pengwu Jiang

<sup>\*</sup> Corresponding authors at: State Key Laboratory of Structural Chemistry, Fujian Key Laboratory of Nanomaterials, Fujian Institute of Research on the Structure of Matter, Chinese Academy of Sciences, Fuzhou, Fujian 350002, China.

E-mail address: huangbing@zju-qz.edu.cn (B. Huang), guanlh@fjirsm.ac.cn (L. Guan)

**Keywords:** electrochemical catalysis, oxygen evolution reaction, seawater electrolysis, membrane electrode assembly, anion exchange membrane electrolyzer

## Supporting note 1:

### AEMWE measurement

The Ce-NiFeOOH/PO<sub>4</sub><sup>3-</sup> catalyst was sprayed over Ni fibers and carbon paper, forming electrodes (2 cm<sup>2</sup>) that were integrated into an anion exchange membrane (AEM) water electrolysis cell. The anode and cathode were separated using an anion exchange membrane (Sustainion® X37-50-grade T, America). The catalytic AEM cell's performance was evaluated with a power supply (Interface 5000E, Gamry) and 1.0 M KOH + seawater fed in at a flow rate of 60 mL min<sup>-1</sup>. Voltage and current measurements provided information on the cell's operational efficiency.

### Electrolyzer efficiency

H<sub>2</sub> production rate @ 0.5 A cm<sup>-2</sup>

$$= (j \text{ A cm}^{-2})(1 \text{ e}^{-}/1.602 \times 10^{-19} \text{ C})(1 \text{ H}_2/2 \text{ e}^{-})$$

$$= 0.5 \text{ A cm}^{-2} / (1.602 \times 10^{-19} \text{ C} \times 2)$$

$$= 2.59 \times 10^{-6} \text{ mol H}_2 \text{ cm}^{-2} \text{ s}^{-1}$$

LHV of H<sub>2</sub>

$$= 120 \text{ kJ g}^{-1} \text{ H}_2 = 2.42 \times 10^5 \text{ J mol}^{-1} \text{ H}_2$$

H<sub>2</sub> power out

$$= (2.59 \times 10^{-6} \text{ mol cm}^{-2} \text{ s}^{-1}) \times (2.42 \times 10^5 \text{ J mol}^{-1})$$

$$= 0.627 \text{ W cm}^{-2}$$

Electrolyzer Power of Ce-NiFeP||Pt/C

Electrolyzer Power (Ce-NiFeP) @ 0.5 A cm<sup>-2</sup>

$$= (0.5 \text{ A cm}^{-2}) (1.68 \text{ V})$$

$$= 0.84 \text{ W cm}^{-2}$$

Efficiency of Ce-NiFeP||Pt/C

$$= (\text{H}_2 \text{ Power Out}) / (\text{Electrolyzer Power})$$

$$= 0.627 \text{ W cm}^{-2} / 0.84 \text{ W cm}^{-2}$$

$$= 74.6\%$$

Price per gasoline-gallon equivalent (GGE)H<sub>2</sub> @ 0.5A cm<sup>-2</sup>

$$= 1 \text{ GGE H}_2 / \text{H}_2 \text{ production rate} \times \text{Electrolyzer power} \times \text{Electricity bill}$$

$$= 0.997 \text{ kg} / (2.59 \times 10^{-6} \text{ mol H}_2 \cdot \text{cm}^{-2} \text{ s}^{-1} \times 2 \text{ kg/mol}) \times 0.84 \text{ W cm}^{-2} \times \$ 0.02/\text{kWh}$$

$$= \$ 0.90/\text{GGE H}_2$$

#### **Calculation of basic electricity expense for H<sub>2</sub> production <sup>1</sup>**

The total electricity consumption for H<sub>2</sub> production was calculated according to the following equation:

$$W = I \times \int U \, dt \quad (1)$$

Where the W is the total electricity consumption, I is the electrolyzer current, U is the electrolyzer voltage, and t is the reaction time.

The amount of H<sub>2</sub> generation was calculated based on the following equation:

$$V = 22.4 \times I \times t / (Z \times F) \quad (2)$$

Where  $V$  is the volume of produced  $H_2$ ,  $Z$  is the electron transfer number (the value of 2 for HER), and  $F$  is the Faraday constant ( $96485 \text{ Cmol}^{-1}$ ).

According to the above results, the basic electricity expense for  $H_2$  production was calculated as:

$$Q = W / V \text{ (kWh m}^{-3} \text{ H}_2\text{)} \quad (3)$$

For an ideal catalyst, assuming that it has no performance decay during the stability test of water splitting, the calculation of basic electricity expense for  $H_2$  production can be simplified to the formula  $[Q = 2.39 \times U \text{ (kWh m}^{-3} \text{ H}_2\text{)}]$  according to the Eqs. (1-3).

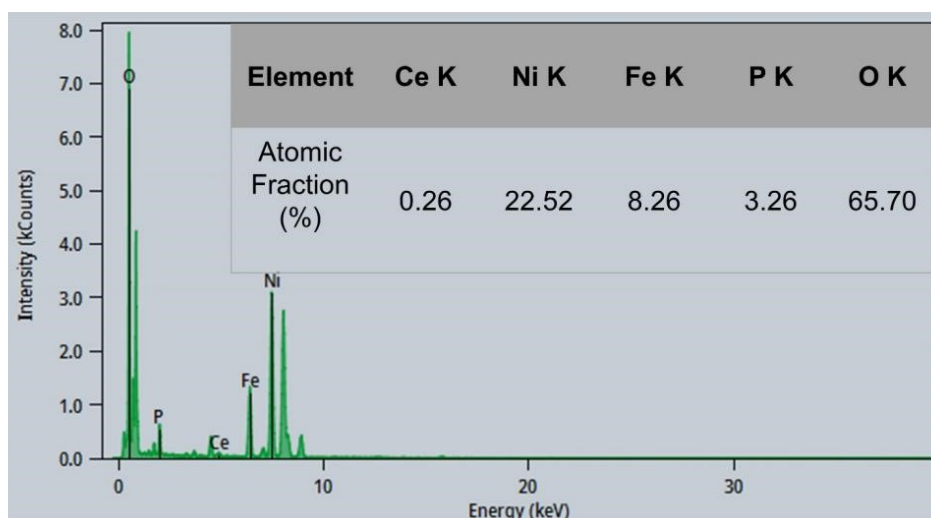

Figure S1. Detailed parameters for TEM EDS of Ce-Ni(Fe)OOH/PO<sub>4</sub><sup>3-</sup>.

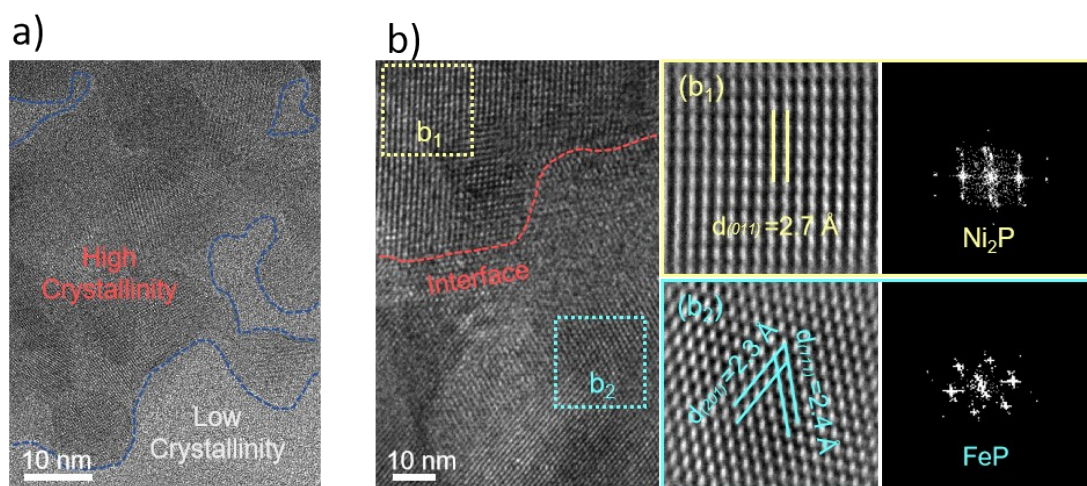

Figure S2. (a) The HR-TEM images of Ce-NiFeP. (b) The enlarged HRTEM image and corresponding Fourier transform pattern.

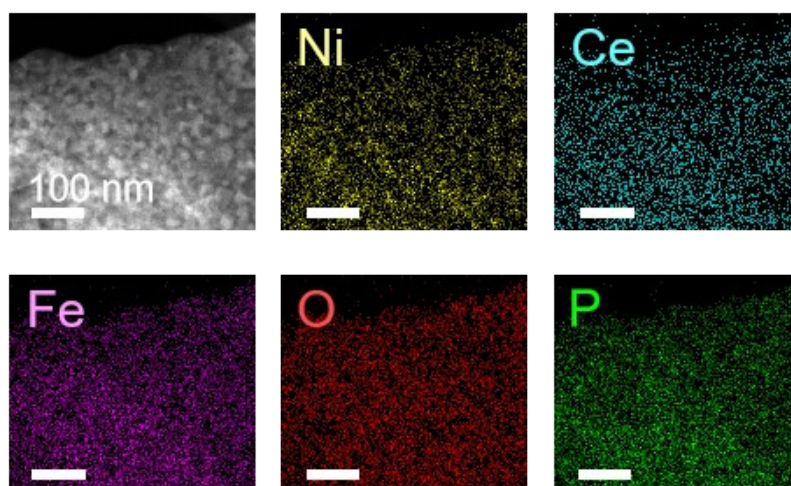

Figure S3. HAADF-STEM with EDS elemental mapping of Ce-NiFeP.

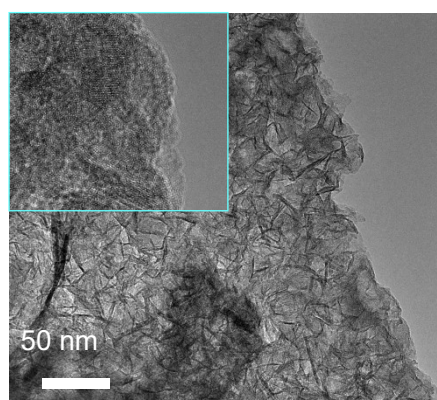

Figure S4. The TEM image of Ce-NiFeOOH/PO<sub>4</sub><sup>3-</sup>.

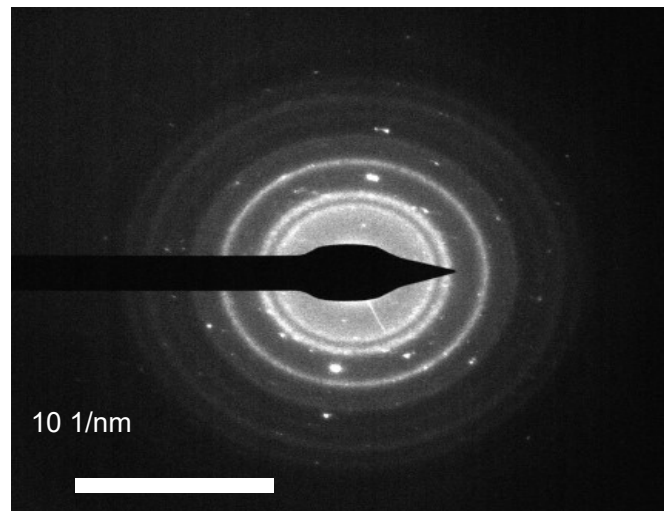

Figure S5. The SAED image of Ce-NiFeOOH/PO<sub>4</sub><sup>3-</sup>.

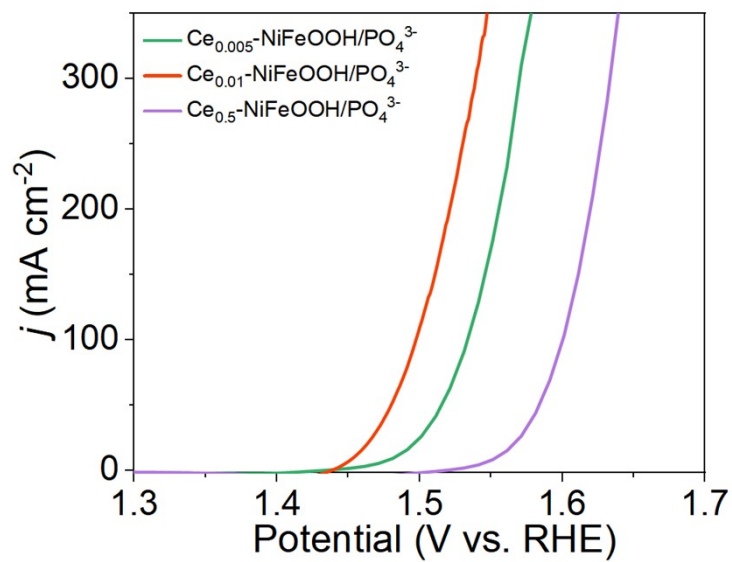

Figure S6. The LSV curves of of Ce-NiFeOOH/PO<sub>4</sub><sup>3-</sup> with different Ce contents.

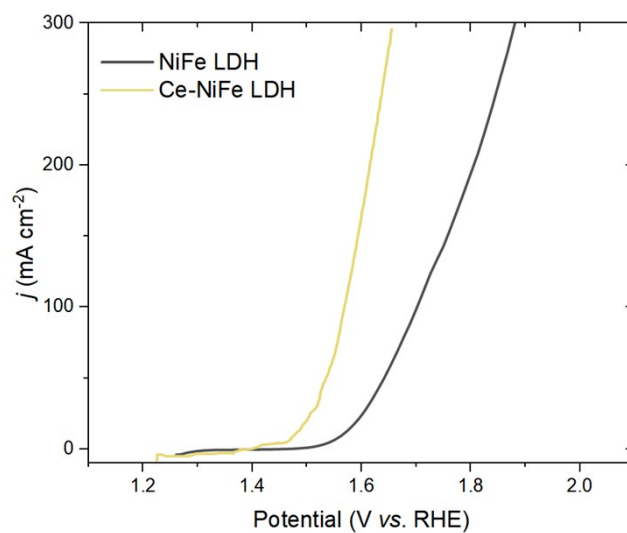

Figure S7. The LSV curves of Ce-NiFe LDH and NiFe LDH.

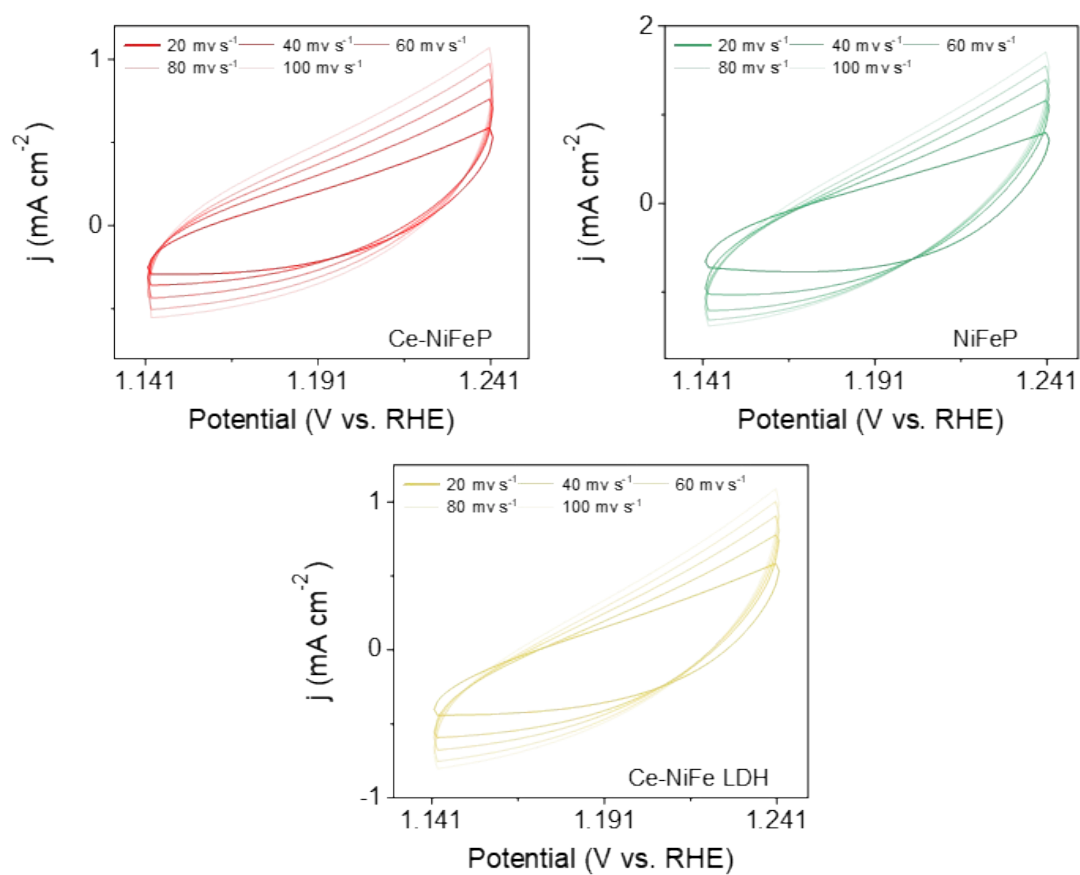

Figure S8. (a-c) CV curves of Ce-NiFeOOH/ $\text{PO}_4^{3-}$ , NiFeOOH and Ce-NiFe LDH electrodes.



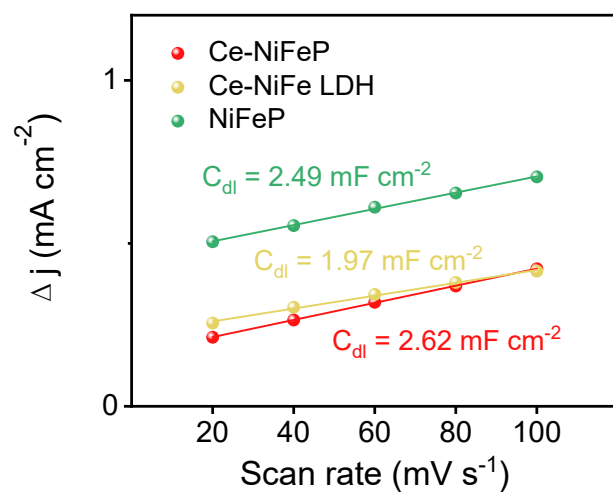

Figure S9.  $C_{dl}$  plots of Ce-NiFeOOH/ $\text{PO}_4^{3-}$ , NiFeOOH and Ce-NiFe LDH.

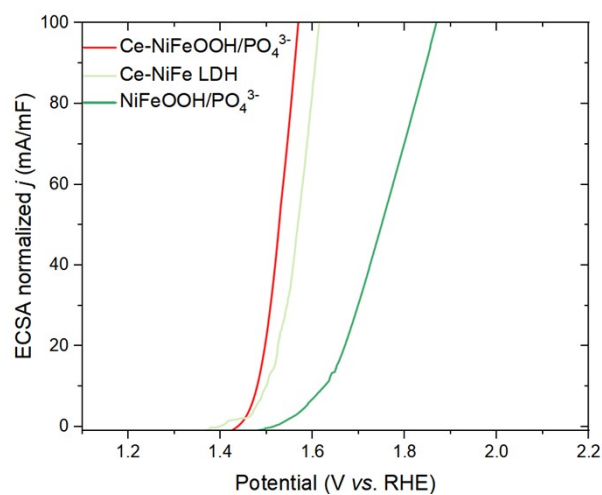

Figure S10. The ECSA normalized LSV curves of Ce-NiFeOOH/ $\text{PO}_4^{3-}$ , Ce-NiFe LDH, and NiFeOOH/ $\text{PO}_4^{3-}$ .

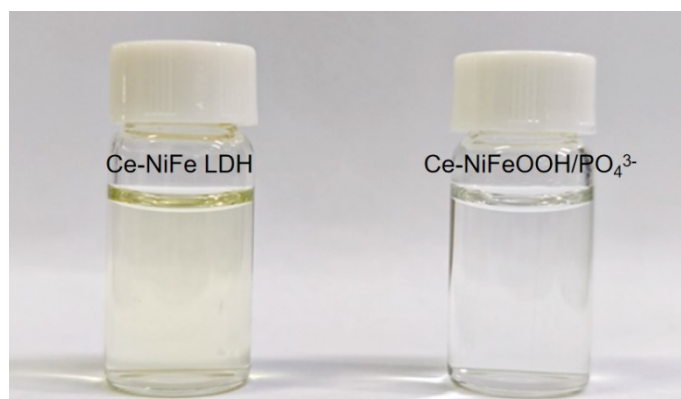

Figure S11. Optical image of  $\text{ClO}^-$  in the electrolyte after long-term stability testing of Ce-NiFe LDH and Ce-NiFeP in 1 M KOH + seawater, respectively.

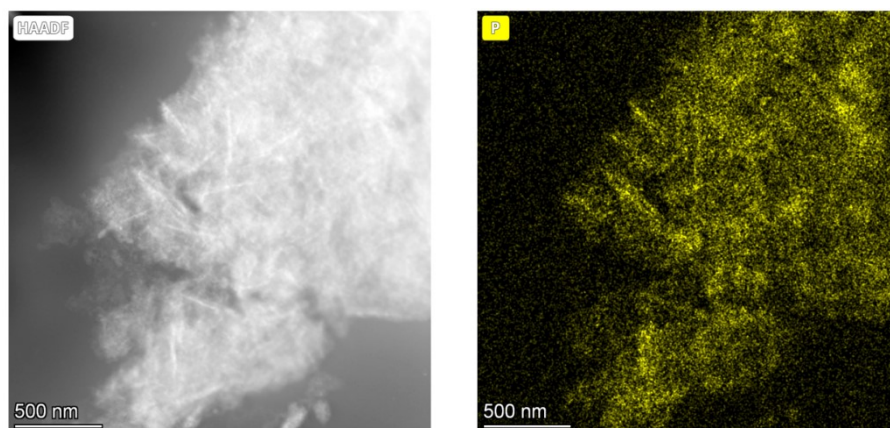

Figure S12. The HADDF-STEM and corresponding EDS mapping image of Ce-NiFeOOH/PO<sub>4</sub><sup>3-</sup> after a 48-hour stability.

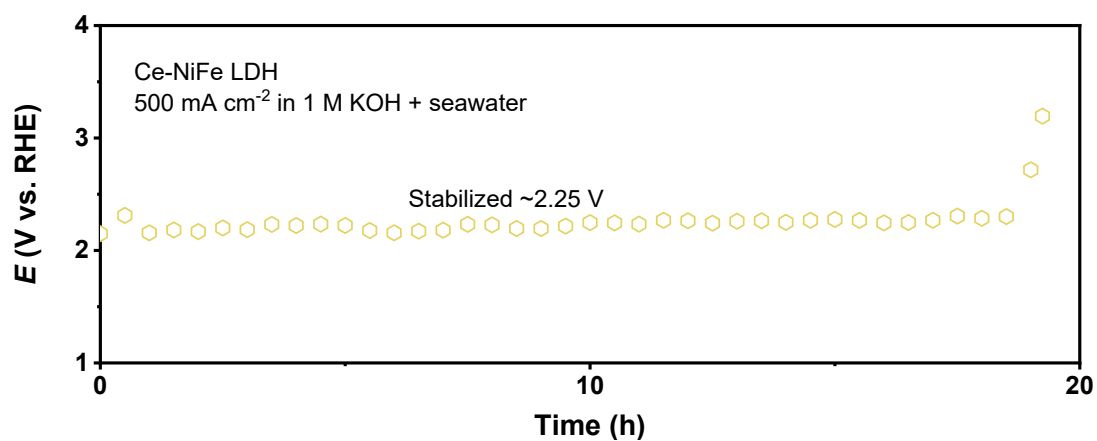

Figure S13. E-T curve of Ce-NiFe LDH in 1 M KOH + seawater electrolyte at 500 mA cm<sup>-2</sup>.

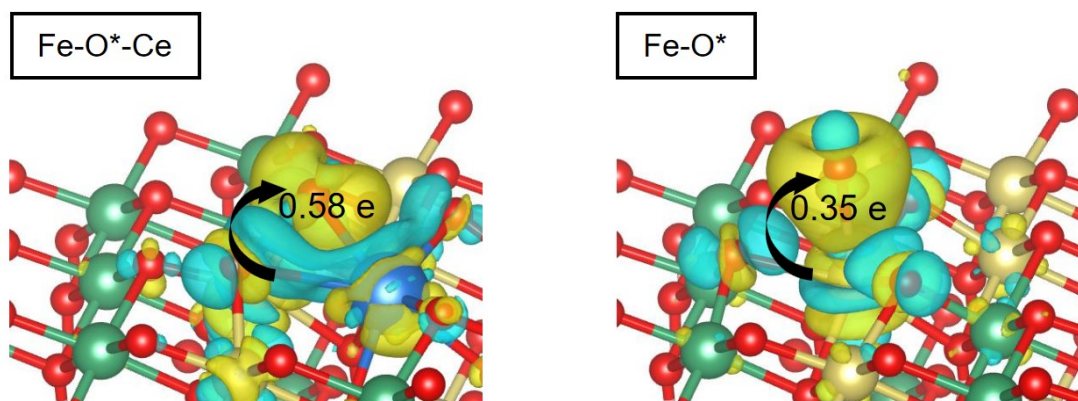

Figure S14. Charge density difference analysis.

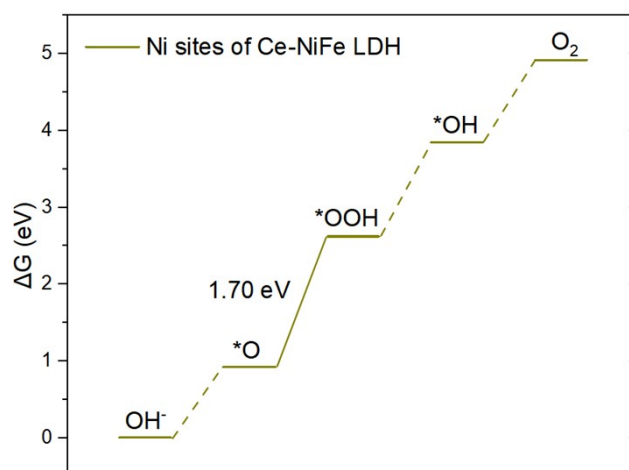

Figure S15. Free energy diagrams for OER on the Ni sites of Ce-Ni(Fe)OOH.

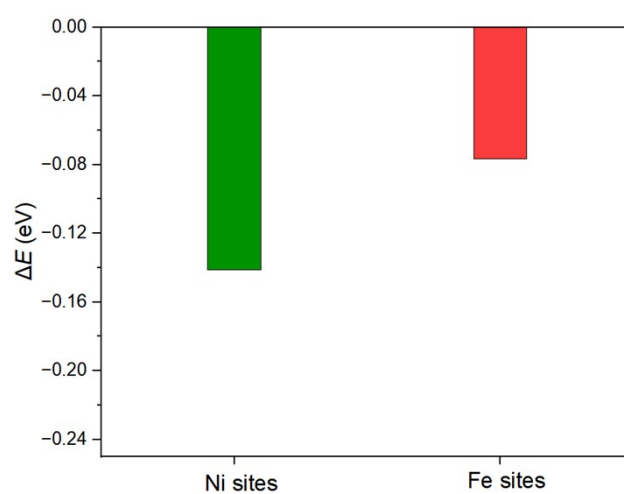

Figure S16. The adsorption energy of  $\text{PO}_4^{3-}$  on the Fe or Ni sites of Ce-Ni(Fe)OOH.

Table S1. Element analysis of Ce-NiFeP and NiFeP by ICP-OES.

| Element                         | Ce-NiFeP |       |      | NiFeP  |       |
|---------------------------------|----------|-------|------|--------|-------|
|                                 | Ni       | Fe    | Ce   | Ni     | Fe    |
| Element concentration<br>(mg/L) | 162.06   | 56.22 | 0.62 | 139.04 | 48.35 |
| wt (%)                          | 31.7     | 11.0  | 0.12 | 27.6   | 9.59  |

Table S2. Comparison of overpotentials of Ce-NiFeOOH/PO<sub>4</sub><sup>3-</sup> at different current density in 1 M KOH, 1 M KOH + 0.5 M NaCl, and 1 M KOH + seawater, respectively.

| Electrolyte          | 10                     | 100                    | 300                    |
|----------------------|------------------------|------------------------|------------------------|
|                      | (mA cm <sup>-2</sup> ) | (mA cm <sup>-2</sup> ) | (mA cm <sup>-2</sup> ) |
| 1 M KOH              | 223                    | 267                    | 309                    |
| 1 M KOH + 0.5 M NaCl | 227                    | 273                    | 318                    |
| 1 M KOH + seawater   | 230                    | 286                    | 348                    |

Table S3. Comparison of  $\eta_{@10 \text{ mA cm}^{-2}}$  in the reported literature for Ce-NiFeOOH/PO<sub>4</sub><sup>3-</sup> in 1 M KOH.

| Catalyst                                 | $\eta_{@10 \text{ mA cm}^{-2}}$<br>(mV) | Ref.             |
|------------------------------------------|-----------------------------------------|------------------|
| Ce-NiFeOOH/PO <sub>4</sub> <sup>3-</sup> | <b>223</b>                              | <b>This work</b> |
| MIL-88A/Ni(OH)(2)                        | 250                                     | 2                |
| Co <sub>4</sub> N@CeO <sub>2</sub>       | 263                                     | 3                |

|                                      |     |   |
|--------------------------------------|-----|---|
| CoSe <sub>2</sub> /MoSe <sub>2</sub> | 320 | 4 |
| R-CoSeO <sub>4</sub>                 | 265 | 5 |
| 3%IrO <sub>x</sub> /NCNT             | 241 | 6 |
| H-LSCF                               | 240 | 7 |
| Ni <sub>3</sub> Fe-BDC               | 265 | 8 |
| Fe <sub>3</sub> O <sub>4</sub>       | 270 | 9 |

Table S4. The calculated results for the free energy diagrams.

| Free energies                        | Ce-Ni(Fe)OOH | Ni(Fe)OOH |
|--------------------------------------|--------------|-----------|
| M*+2H <sub>2</sub> O                 | 0            | 0         |
| M*OH+H <sub>2</sub> O+H <sup>+</sup> | 0.74         | 0.91      |
| M*O+H <sub>2</sub> O+2H <sup>+</sup> | 2.48         | 2.34      |
| M*OOH+3H <sup>+</sup>                | 3.57         | 3.96      |
| M*+O <sub>2</sub> +4H <sup>+</sup>   | 4.92         | 4.92      |

Table S5. Performance comparison of Ce-NiFeOOH/PO<sub>4</sub><sup>3-</sup> with three other reported electrocatalysts in AEM seawater electrolyzers.

| Catalyst                                                        | Co/P-Fe <sub>3</sub> O <sub>4</sub> | NFCP  | NiCoP <sub>v</sub> | Ce-NiFeOOH/PO <sub>4</sub> <sup>3-</sup> |
|-----------------------------------------------------------------|-------------------------------------|-------|--------------------|------------------------------------------|
| Electrolyzer efficiency<br>at 500 mA cm <sup>-2</sup> (%)       | 68.5                                | 59.9  | 51.6               | 74.6                                     |
| Price per GGE H <sub>2</sub> at 500<br>mA cm <sup>-2</sup> (\$) | 0.980                               | 1.119 | 1.150              | 0.897                                    |
| <i>E</i> at 500 mA cm <sup>-2</sup><br>(V)                      | 1.84                                | 2.095 | 2.43               | 1.68                                     |
| <i>j</i> <sub>max</sub><br>(mA cm <sup>-2</sup> )               | 1000                                | 500   | 900                | 1500                                     |
| Electricity expense<br>(kWh)                                    | 4.38                                | 5.01  | 5.81               | 4.02                                     |

|      |                     |                        |                    |           |
|------|---------------------|------------------------|--------------------|-----------|
|      | <i>Appl. Catal.</i> |                        | <i>Adv. Energy</i> |           |
|      | <i>B: Environ.</i>  | <i>ACS Catal.</i>      | <i>Mater.</i>      | This work |
| Ref. | <b>2024</b> , 357,  | <b>2024</b> ,14,18322. | <b>2024</b> ,      |           |
|      | 124269.             |                        | 14, 2400975        |           |

## References

- 1 D. Kong, C. Meng, Y. Wang, X. Chen, J. Zhang, L. Zhao, J. Ji, L. Zhang, Y. Zhou, High-density accessible Ru-O-Co moieties with accelerated formation of activated oxygen species for freshwater and seawater electrolysis, *Appl. Catal. B: Environ.*, 2024, **343**, 123578.
- 2 Z. Qian, K. Wang, K. Shi, Z. Fu, Z. Mai, X. Wang, Z. Tang, Y. Tian, Interfacial electron transfer of heterostructured MIL-88A/Ni (OH)<sub>2</sub> enhances the oxygen evolution reaction in alkaline solutions, *J. Mater. Chem. A*, 2020, **8**, 3311-3321.
- 3 P. Zhou, G. Hai, G. Zhao, R. Li, X. Huang, Y. Lu, G. Wang, CeO<sub>2</sub> as an “electron pump” to boost the performance of Co<sub>4</sub>N in electrocatalytic hydrogen evolution, oxygen evolution and biomass oxidation valorization, *Appl. Catal. B: Environ.*, 2023, **325**, 122364.
- 4 Y. Yang, Y. Xiong, J. Yang, D. Qian, Y. Chen, Y. He, Z. Hu, Three-Dimensional Heterostructured CoSe<sub>2</sub>/MoSe<sub>2</sub>@CC as Trifunctional Electrocatalysts for Energy-Efficient Hydrogen Production, *Energ. Fuels*, 2024, **38**, 2260-2272.
- 5 J. Yu, W. Yu, Y. Wang, X. Li, R. Liu, X. Zhang, H. Liu, W. Zhou, Capture and recycling of toxic selenite anions by cobalt-based metal-organic-frameworks for electrocatalytic overall water splitting, *Chem. Eng. J.*, 2022, **433**, 134553.
- 6 N. Liu, Y. Wang, Q. Zhang, J. Guan, Trifunctional iridium-based electrocatalysts for overall water splitting and Zn-air batteries, *Electrochim. Acta*, 2021, **380**, 138215.
- 7 H. Zhang, D. Guan, Z. Hu, Y. C. Huang, X. Wu, J. Dai, C. L. Dong, X. Xu, H. J. Lin, C. T. Chen, W. Zhou, Z. Shao, Exceptional lattice-oxygen participation on artificially controllable electrochemistry-induced crystalline-amorphous phase to boost oxygen-evolving performance, *Appl. Catal. B: Environ.*, 2021, **297**, 120484.
- 8 L. Xiao, J. Han, Z. Wang, J. Guan, Nanorod-like NiFe metal-organic frameworks for oxygen evolution in alkaline seawater media, *Int. J. Hydrogen Energy*, 2023, **48**, 23776-23784.
- 9 N. Akbari, S. Nandy, K.H. Chae, M.M. Najafpour, Dynamic Changes of an Anodized FeNi Alloy during the Oxygen Evolution Reaction under Alkaline Conditions, *Langmuir*, 2023, **39**, 11807.
